# Supplementary material for: Successive Osteosarcoma Relapses after the First Line O2006/Sarcome-09 Trial: What Can We Learn for Further Phase-II Trials?
Source: Cancers (Basel). 2021 Apr 2;13(7):1683. doi: 10.3390/cancers13071683 (PMC8038261; doi:10.3390/cancers13071683)
Supplement: Supplementary file 1 [file cancers-13-01683-s001.pdf]

# Successive Osteosarcoma Relapses after the First Line O2006/Sarcome-09 Trial: What Can We Learn for Further Phase-II Trials?

Eric Thebault, Sophie Piperno-Neumann, Diep Tran, Hélène Pacquement, Perrine Marec-Berard, Cyril Lervat, Marie-Pierre Castex, Morgane Cleirec, Emmanuelle Bompas, Jean-Pierre Vannier, Dominique Plantaz, Laure Saumet, Cecile Verite, Olivier Collard, Claire Pluchart, Claire Briandet, Laure Monard, Laurence Brugieres, Marie-Cécile Le Deley and Nathalie Gaspar

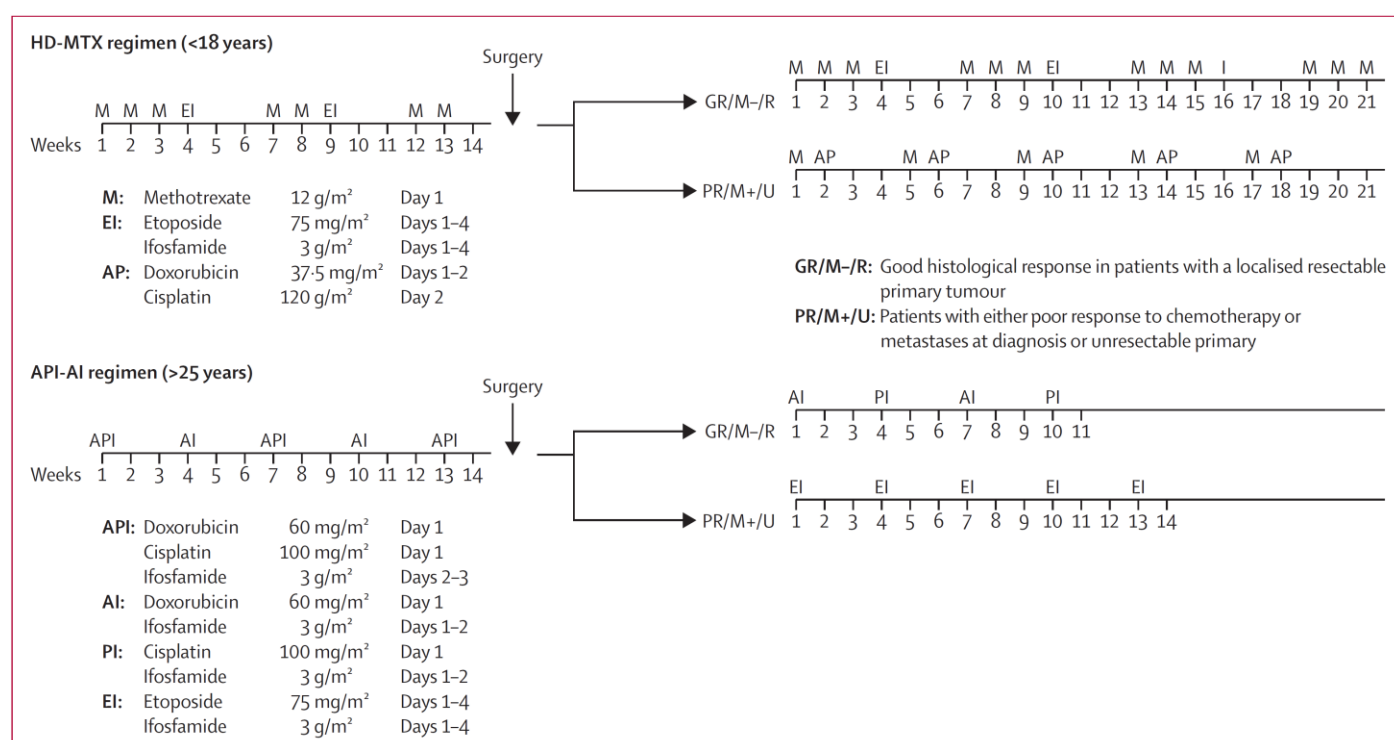

**Figure S1.** OS2006/Sarcome-09 Backbone chemotherapy scheme.

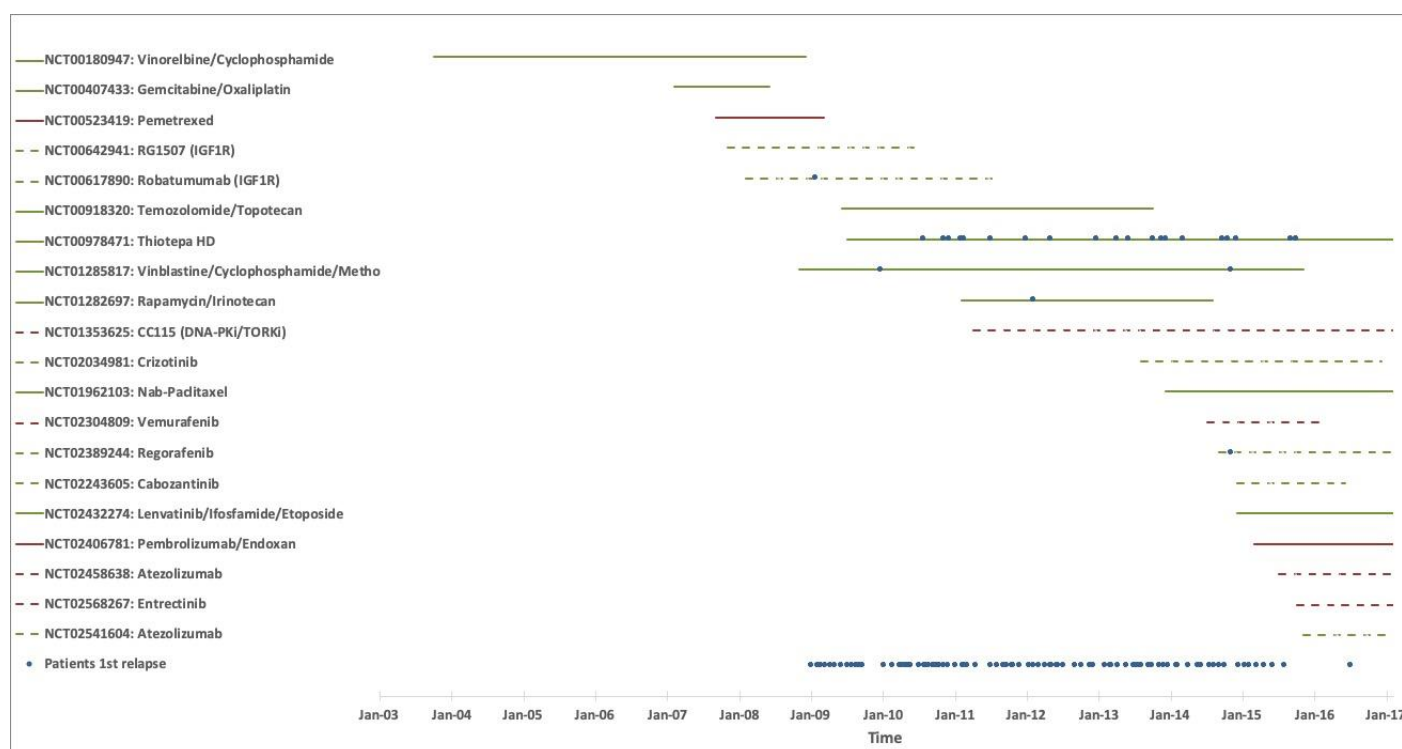

A

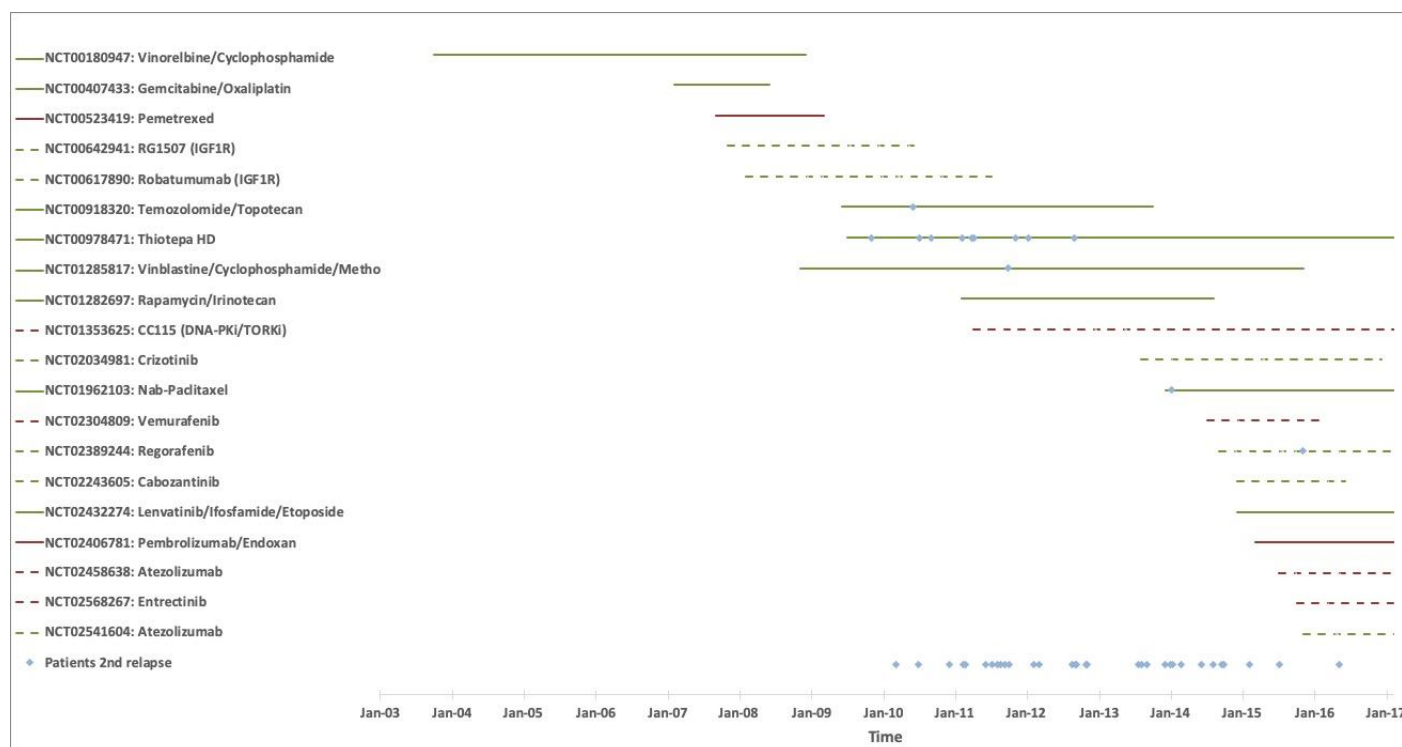

B

**Figure S2.** Active Phase-I and Phase-II trials for relapsed osteosarcoma in France between March 2007 and June 2016. **A-** Trials open for first osteosarcoma relapses. **B-** Trials open for second and subsequent osteosarcoma relapses. Plain line corresponds to trials with chemotherapy; dot line to trials without any chemotherapy agent; Green line to trials with paediatric population included; and red line to trials without paediatric population included (ie criterion  $\geq 18$  years).

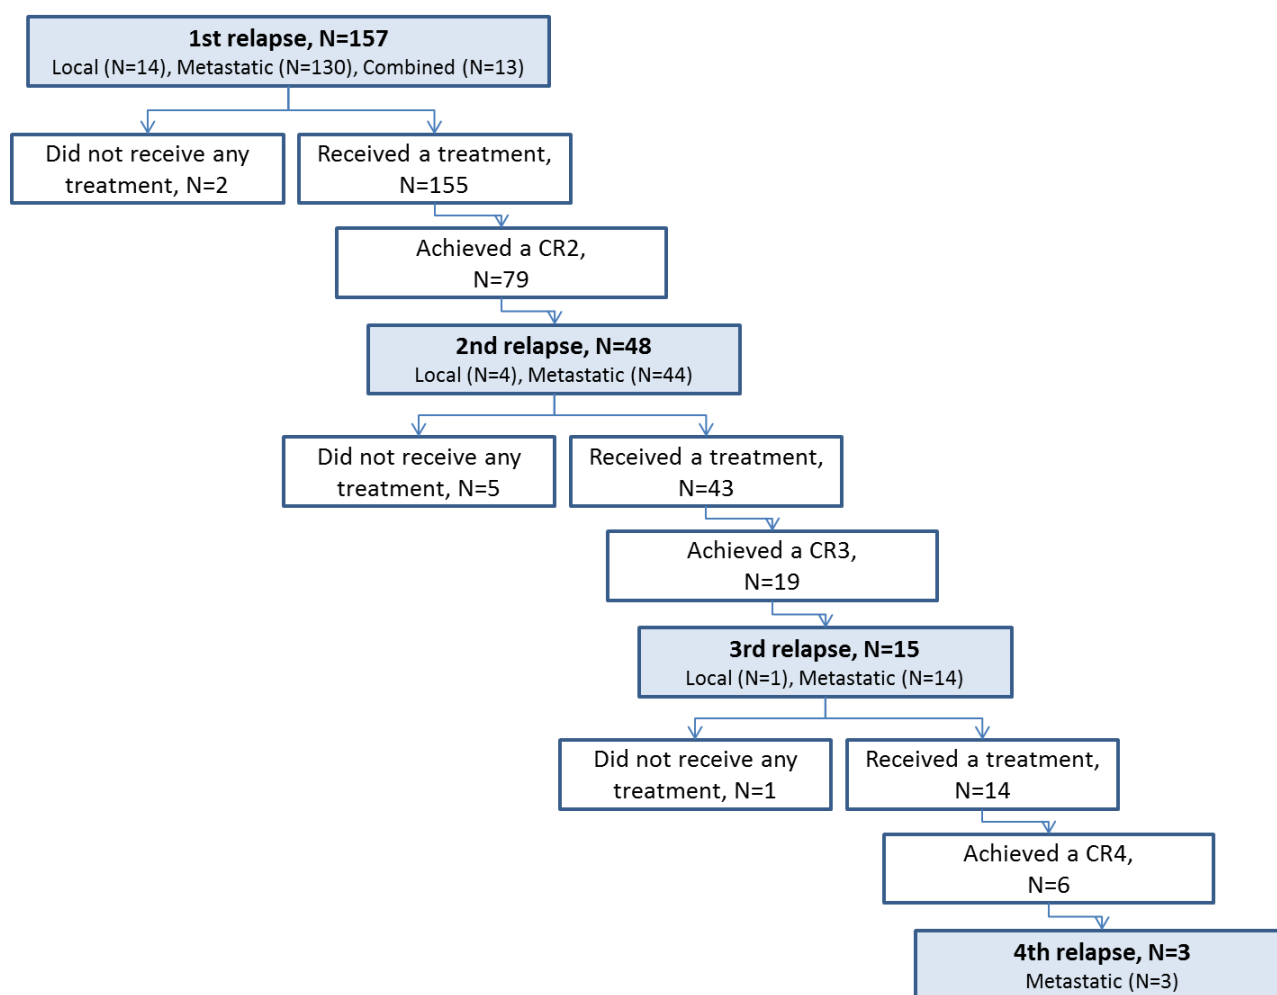

**Figure S3.** First and subsequent relapses of osteosarcoma.

**Table S1.** Open Trials for recurrent osteosarcoma in France between 04/2007 and 06/2016 (trials extracted from a previous paper 16)

| Publication Reference | Drug Tested                                             | Diseases Included                | Inclusion Criteria |                                                                                        | Inclusion |         | Primary Endpoint              | Response Evaluation Criteria | Trial    | Randomization |
|-----------------------|---------------------------------------------------------|----------------------------------|--------------------|----------------------------------------------------------------------------------------|-----------|---------|-------------------------------|------------------------------|----------|---------------|
|                       |                                                         |                                  | Age                | Other                                                                                  | Start     | End     |                               |                              |          |               |
| NCT00180947           | Vinorelbine + Endoxan                                   | Solid tumours                    | 12m-25y            | Relapse without standard therapy                                                       | oct-03    | dec-08  | 2 months Response rate        | WHO                          | Phase II | No            |
| NCT00407433           | Gemcitabine + Oxaliplatin                               | Solid tumours                    | 6m-21y             | Relapsed or refractory tumours                                                         | feb-07    | jun-08  | 2 months Response rate        | WHO                          | Phase II | No            |
| NCT00523419           | Pemetrexed                                              | Osteosarcoma                     | >18y               | Already received first line chemotherapy                                               | sept-07   | mar-09  | Best 1,5 months response rate | RECIST                       | Phase II | No            |
| NCT00642941           | Teprotumumab                                            | Sarcoma                          | >2y                | Recurrent or refractory sarcoma (osteosarcoma or other)                                | nov-07    | jun-10  | 6 months response rate        |                              | Phase II | No            |
| NCT00617890           | Robatumumab                                             | Osteosarcoma and Ewing's sarcoma | >4y                | Relapse sarcoma operable or not                                                        | feb-08    | aug-11  | DCR (CR or PR)                | RECIST or WHO                | Phase II | No            |
| NCT00918320           | Temozolomide + Topotecan                                | Solid tumours                    | 6m – 20y           | Relapsed or refractory tumours                                                         | jun-09    | oct-13  | 2 months Response rate        |                              | Phase II | No            |
| NCT00978471           | Thiotepa HD                                             | Osteosarcoma                     | 1-50ans            | 1st relapse or 2nd relapse after surgery only; Surgery of all the sites of the relapse | jul-09    | dec-17  | 2 years OS                    | 0                            | Phase II | Yes           |
| NCT01285817           | Celecoxib+Vinblastine + Cyclophosphamide + Methotrexate | Solid tumours                    | 4y-21y             | Progression or Relapse; Refractory                                                     | nov-10    | nov-15  | PFS                           | ?                            | Phase II | No            |
| NCT01282697           | Rapamycin + Irinotecan                                  | Solid tumours                    | 1y-21y             | Relapsed or refractory tumours                                                         | feb-11    | aug-14  | Maximum tolerated dose        | 0                            | Phase I  | No            |
| NCT01353625           | CC-115 (mTOR inhibitor)                                 | Solid and Hematologic cancers    | >18y               | Progression or not tolerated standard therapy; Never treated with mTOR inhibitor       | apr-11    | sept-18 | PD et PK                      | 0                            | Phase I  | No            |

|             |                                               |                                                        |        |                                                                                          |         |         |          |                                          |        |            |     |
|-------------|-----------------------------------------------|--------------------------------------------------------|--------|------------------------------------------------------------------------------------------|---------|---------|----------|------------------------------------------|--------|------------|-----|
| NCT02034981 | Crizotinib                                    | Hematologic and solid tumours                          | >1y    | No standard therapy; One proven specific alterations among ALK, MET, RON, and ROS1 genes | aug-13  | dec-16  | 2 months | Response rate                            | RECIST | Phase II   | No  |
| NCT01962103 | Nab-Paclitaxel                                | Solid Tumours                                          | 6m-24y | Solid tumours refractory or on relapse or without standard therapeutic                   | dec-13  | dec-18  |          | Best response rate                       | RECIST | Phase I/II | No  |
| NCT02304809 | Vemurafenib                                   | Solid tumours or Hematologic cancers                   | >18y   | Unresectable malignancy resistant or refractory; BRAF V600 mutation                      | jul-14  | feb-16  | 2 months | Response rate                            | RECIST | Phase II   | No  |
| NCT02389244 | Regorafenib                                   | Ewing Sarcoma, Chondrosarcoma, Osteosarcoma, Chondroma | >10y   | Progression disease; Metastatic disease not amenable to surgical resection               | sept-14 | sept-19 |          | PFS                                      | RECIST | Phase II   | Yes |
| NCT02243605 | Cabozantinib                                  | Osteosarcoma and Ewing's sarcoma                       | >12y   | Relapsed disease; Progressive disease                                                    | dec-14  | jun-16  | 6 months | Non progression (CR, PR, SD)             | RECIST | Phase II   | No  |
| NCT02432274 | Lenvatinib +/- Cyclophosphamide and Etoposide | Solid tumours                                          | 2y-25y | Relapsed or refractory tumour that has progressed                                        | dec-14  | jun-18  |          | Objective response rate and 4 months PFS | RECIST | Phase I/II | No  |
| NCT02406781 | Pembrolizumab + Cyclophosphamide              | Sarcoma                                                | >18y   | Advanced non resectable or metastatic disease; Progression                               | mar-15  | mar-17  | 6 months | response rate                            | RECIST | Phase II   | No  |
| NCT02458638 | Atezolizumab                                  | Solid tumours                                          | >18y   | Progression disease                                                                      | jul-15  | dec-20  | 4 months | Non-progression rate (CR, PR, SD)        | RECIST | Phase II   | No  |

---

|                    |              |                                     |      |                                                                   |        |         |                         |        |            |    |
|--------------------|--------------|-------------------------------------|------|-------------------------------------------------------------------|--------|---------|-------------------------|--------|------------|----|
| <b>NCT02568267</b> | Entrectinib  | Solid and<br>hematologic<br>cancers | >18y | NTRK1/2/3, ROS1, or ALK<br>gene rearrangement; CNS<br>involvement | oct-15 | oct-17  | Best response rate      | RECIST | Phase II   | No |
| <b>NCT02541604</b> | Atezolizumab | Solid tumours                       | <30y | Relapsed or refractory                                            | nov-15 | janv-22 | PFS; Best response rate | RECIST | Phase I/II | No |

---

**Table S2.** Baseline patient and tumour characteristics and first-line treatment of the 157 patients with a relapse.

| Initial Characteristics                                            | Number (%)<br>Median (min-max) |
|--------------------------------------------------------------------|--------------------------------|
| <b>Age at study entry in the OS2006/Sarcome-09 study, in years</b> |                                |
| Median (range)                                                     | 15.4 (6.4-50.4)                |
| Less than 12 years, N (%)                                          | 34 (21.7%)                     |
| 12-17 years, N (%)                                                 | 73 (46.5%)                     |
| 18-25 years, N (%)                                                 | 30 (19.1%)                     |
| >25 years, N (%)                                                   | 20 (12.7%)                     |
| <b>Primary tumour site</b>                                         |                                |
| Trunk /head and neck, N (%)                                        | 14 (8.9%)                      |
| Lower limb, N (%)                                                  | 117 (74.5%)                    |
| Upper limb, N (%)                                                  | 26 (16.6%)                     |
| <b>Metastasis at diagnosis</b>                                     |                                |
| Lung metastasis only, N (%)                                        | 24 (15.3%)                     |
| Bone metastasis only, N (%)                                        | 19 (12.1%)                     |
| Combined metastasis (Lung + other site), N (%)                     | 3 (1.9%)                       |
| <b>Type of centre for the first line treatment</b>                 |                                |
| Medical oncology department, N (%)                                 | 2 (1.3%)                       |
| Paediatric centre, N (%)                                           | 105 (66.9%)                    |
| <b>Chemotherapy as first-line treatment (OS2006 protocol)</b>      |                                |
| Methotrexate-etoposide-ifosfamide, N (%)                           | 124 (79.0%)                    |
| API-AI, N (%)                                                      | 33 (21.0%)                     |
| <b>Treatment allocated by randomisation</b>                        |                                |
| No randomisation, N (%)                                            | 58 (36.9%)                     |
| Without Zoledronate, N (%)                                         | 45 (28.7%)                     |
| With Zoledronate, N (%)                                            | 54 (34.4%)                     |
| <b>Surgery of the primary tumour</b>                               |                                |
| Conservative surgery, N (%)                                        | 139 (88.5%)                    |
| Amputation, N (%)                                                  | 18 (11.5%)                     |
| <b>Histological response of primitive tumour</b>                   |                                |
| Good histological response (< 10% viable cells), N (%)             | 89 (56.7%)                     |
| Poor histological response (≥ 10% viable cells), N (%)             | 68 (43.3%)                     |

**Table S3.** Characteristics of the 39 patients with a unique lung nodule at first relapse, overall and according to treatment received at relapse.

| Patient and Tumour Characteristics               | Overall<br>N = 39 | Surgery alone<br>N = 21 | Systemic Treatment<br>N = 18 | p-value |
|--------------------------------------------------|-------------------|-------------------------|------------------------------|---------|
| <b>Metastasis at diagnosis</b>                   |                   |                         |                              | 1.00 *  |
| No Metastasis, N (%)                             | 30 (76.9%)        | 16 (76.2%)              | 14 (77.8%)                   |         |
| Lung metastasis +/- other site, N (%)            | 9 (23.1%)         | 5 (23.8%)               | 4 (22.2%)                    |         |
| <b>Histological response of primitive tumour</b> |                   |                         |                              | 1.00 *  |
| Good histological response, N (%)                | 22 (56.4%)        | 12 (57.1%)              | 10 (55.6%)                   |         |
| Poor histological response, N (%)                | 17 (43.6%)        | 9 (42.9%)               | 8 (44.4%)                    |         |
| <b>Type of centre</b>                            |                   |                         |                              | 0.07 *  |
| Medical oncology department, N (%)               | 10 (25.6%)        | 8 (38.1%)               | 2 (11.1%)                    |         |
| Paediatric centre, N (%)                         | 29 (74.4%)        | 13 (61.9%)              | 16 (88.9%)                   |         |
| <b>Age at relapse (years)</b>                    |                   |                         |                              |         |
| Median (range)                                   | 16.7 (8.4-43.6)   | 17.4 (9.5-43.6)         | 15.4 (8.4-25.7)              | 0.18 ** |
| Less than 12 years, N (%)                        | 5 (12.8%)         | 2 (9.5%)                | 3 (16.7%)                    |         |
| 12-17 years, N (%)                               | 20 (51.3%)        | 9 (42.9%)               | 11 (61.1%)                   |         |
| 18-25 years, N (%)                               | 11 (28.2%)        | 7 (33.3%)               | 4 (22.2%)                    |         |

| Patient and Tumour Characteristics                         | Overall<br>N = 39 | Surgery alone<br>N = 21 | Systemic Treatment<br>N = 18 | p-value |
|------------------------------------------------------------|-------------------|-------------------------|------------------------------|---------|
| >25 years, N (%)                                           | 3 (7.7%)          | 3 (14.3%)               | 0 (0%)                       |         |
| <b>Time interval from diagnosis to 1st relapse (years)</b> |                   |                         |                              |         |
| Median (range)                                             | 1.7 (0.9-5.7)     | 1.9 (0.9-5.7)           | 1.6 (1.2-3.6)                | 0.75 ** |
| <1 year, N (%)                                             | 1 (2.6%)          | 1 (4.8%)                | 0 (0%)                       |         |
| >1 year, N (%)                                             | 39 (97.4%)        | 20 (95.2%)              | 18 (100%)                    |         |
| <b>Diameter of the nodule</b>                              |                   |                         |                              |         |
| Median (range)                                             | 15 (3-46)         | 14 (4-43)               | 16 (3-46)                    | 0.42 ** |
| <5 mm, N (%)                                               | 3 (7.7%)          | 1 (4.8%)                | 2 (11.1%)                    |         |
| 5-9mm, N (%)                                               | 11 (28.2%)        | 7 (33.3%)               | 4 (22.2%)                    |         |
| ≥10mm, N (%)                                               | 25 (64.1%)        | 13 (61.9%)              | 12 (66.7%)                   |         |

\* Fisher exact test; \*\* Wilcoxon test of the comparison of the distribution of the continuous variable.

**Table S4.** Characteristics of the subsequent relapses.

| Patient and Tumour Characteristics        | First Relapse<br>N = 157 | Second Relapse<br>N = 48 | Third Relapse<br>N = 15 |
|-------------------------------------------|--------------------------|--------------------------|-------------------------|
| <b>Site of relapse</b>                    |                          |                          |                         |
| Local relapse, N (%)                      | 14 (8.9%)                | 4 (8.3%)                 | 1 (6.7%)                |
| Metastases only, N (%)                    | 130 (82.8%)              | 44 (91.7%)               | 14 (93.3%)              |
| Combined, N (%)                           | 13 (8.3%)                | 0                        | 0                       |
| <b>Treatment for relapse</b>              |                          |                          |                         |
| None, N (%)                               | 2 (1.3%)                 | 5 (10.4%)                | 1 (6.7%)                |
| Systemic treatment, N (%)                 | 116 (73.9%)              | 32 (66.7%)               | 9 (60%)                 |
| Surgery, N (%)                            | 107 (68.2%)              | 25 (52.1%)               | 8 (53%)                 |
| Radiation therapy, N (%)                  | 17 (10.8%)               | 8 (16.7%)                | 1 (6.7%)                |
| Radiofrequency ablation, N (%)            | 2 (1.3%)                 | 2 (4.2%)                 | 1 (6.7%)                |
| Other, N (%)                              | 1 (1.3%)                 | 0 (0%)                   | 1 (6.7%)                |
| <b>Complete remission obtained, N (%)</b> | 79/155 (51.0%)           | 19/43 (44.2%)            | 6/14 (42.9%)            |
| <b>Further relapse</b>                    | 48                       | 15                       | 3                       |
| <b>Progression-Free Survival</b>          |                          |                          |                         |
| 1-year                                    | 41.8%                    | 27.1%                    | 36.6%                   |
